# Supplementary material for: Effects of Cancer Presence and Therapy on the Platelet Proteome
Source: MDPI journal article supplement (doi:10.3390/ijms22158236), 2021-07-30
Supplement: s1 [file s1]

Table legends:

Supplemental Table S1:

List of all 4200 database entries and the linked to 4059 unique proteins in platelets.

Supplemental Table S2:

List of 118 proteins which were expressed significantly different in platelets from cancer patients compared to healthy controls.

Supplemental Table S3:

List of 50 proteins which were at least 1.5-fold higher expressed in platelets from patients with cancer compared to healthy individuals.

Supplemental Table S4:

List of 36 proteins which were at least 1.5-fold higher expressed in platelets from healthy controls compared to cancer patients.

Supplemental Table S5:

Upregulated proteins in platelets after antitumor treatment.

Supplemental Table S6:

Downregulated proteins in platelets after antitumor treatment.

Supplemental Table S7:

Proteins in platelets uniquely identified after start antitumor treatment.

Supplemental Table S8:

Proteins in platelets only identified before start of antitumor treatment
